# Supplementary material for: Advances in uremic toxin detection and monitoring in the management of chronic kidney disease progression to end-stage renal disease
Source: Royal Society of Chemistry journal article supplement (doi:10.1039/d4an00057a), 2024-01-01
Supplement: d4an00057a1.pdf [file d4an00057a1.pdf]

**Supporting Data** Table S1: Tests (T), indicator (I) or observation (O) commonly used to assess kidney function and damage in CKD.

| Order     | Risk factor                       | Standard Value                                      | Threshold                                                                | Dependence                                                                        |
|-----------|-----------------------------------|-----------------------------------------------------|--------------------------------------------------------------------------|-----------------------------------------------------------------------------------|
| <b>T1</b> | Glomerular filtration rate (GFR)  | 90 mL/min/1.73 m <sup>2</sup> in young adults       | 15 mL/min/1.73 m <sup>2</sup>                                            | Age, sex, and body size                                                           |
| <b>T2</b> | Serum creatinine (SC-1)           | Males: 0.74-1.35 mg/dL<br>Females: 0.59- 1.04 mg/dL | As kidney function declines, serum creatinine levels rise                | Varies by age, sex, and muscle mass but for many adults,                          |
| <b>T3</b> | Albumin-to-creatinine ratio (ACR) | < 30 mg/g                                           | 30-299 mg/g                                                              | Not provided                                                                      |
| <b>T4</b> | Blood urea nitrogen (BUN)         | 7-20 mg/dL                                          | Not provided                                                             | BUN levels increase with decreasing kidney function                               |
| <b>T5</b> | Serum phosphorus (SP)             | 2.5-4.5 mg/dL                                       | Not provided                                                             | High phosphorus levels might be seen as CKD progresses                            |
| <b>T6</b> | Serum calcium (SC-2)              | 8.5-10.2 mg/dL                                      | Not provided                                                             | Calcium levels can be affected in CKD, often decreasing as the disease progresses |
| <b>T7</b> | Hemoglobin (HG)                   | Males: 13.8-17.2 g/dL<br>Females: 12.1-15.1 g/dL    | Anemia (low hemoglobin) is common in CKD and might necessitate treatment | Varies by age and sex but typically                                               |
| <b>T8</b> | Parathyroid hormone (PTH)         | 10-65 pg/mL.                                        | Not provided                                                             | PTH can increase in CKD due to disturbances in calcium and phosphorus metabolism  |
| <b>T9</b> | Potassium (P)                     | 3.5-5.0 mEq/L                                       | Not provided                                                             | Hyperkalemia (high potassium levels) can occur in advanced stages of CKD          |
| <b>I1</b> | Ultrasound (Ult)                  | Not provided                                        | Not provided                                                             | kidney size, cysts, tumors, obstructions, and other structural abnormalities      |
| <b>O1</b> | Symptoms (SYM)                    | Not provided                                        | Not provided                                                             | fatigue, nausea, itching, muscle cramps, and swelling can become more prominent   |

Data from [https://www.uptodate.com/contents/uremic-toxins?search=uremic%20toxins&source=search\\_result&selectedTitle=1~59&usage\\_type=default&display\\_rank=1](https://www.uptodate.com/contents/uremic-toxins?search=uremic%20toxins&source=search_result&selectedTitle=1~59&usage_type=default&display_rank=1)

**Supporting Data** Table S2: Lower limit of qualitative and quantitative techniques and limitations (challenges) for uremic toxins analysis

| <b>Method</b>                | <b>Lower Limit of Detection</b>    | <b>Limitations (challenges)</b>                                                                                              |
|------------------------------|------------------------------------|------------------------------------------------------------------------------------------------------------------------------|
| Electrochemical/Colorimetric | Nanomolar to picomolar (nM to pM)  | interference from complex matrices or non-specific binding; limited sensitivity and specificity compared to other techniques |
| Fluorescence/FTIR            | Picomolar to femtomolar (pM to fM) | background fluorescence or quenching effects; interference by water vapor and other contaminants affecting sensitivity       |
| ELISA/CMIA                   | Picogram to nanogram (pg to ng)    | long incubation times and complex sample preparation; interference and limited dynamic range                                 |
| GC/MS                        | Femtogram to picogram (fg to pg)   | complex sample preparation. slower compared to other methods; may require derivatization for some analytes                   |
| Label-mediated SERS          | Picomolar to femtomolar (pM to fM) | variability in signal intensity and specificity depending on the labeling strategy and surface properties                    |
| Labelled SERS                | Picomolar to femtomolar (pM to fM) | additional steps for labeling; signal variability due to labeling efficiency and stability                                   |
